# Supplementary material for: Serum biomarker analysis of collagen disease patients with acute-onset diffuse interstitial lung disease
Source: PubMed Central journal article supplement (PMC3598392; doi:10.1186/1471-2172-14-9), 2013-02-14
Supplement: 1471-2172-14-9-S3.pdf [file 1471-2172-14-9-S3.pdf]

Supplementary Table 3 Characteristics of collagen disease or RA patients with AoDILD.

|                                               |           | AoDILD patients with collagen disease | AoDILD patients with RA |
|-----------------------------------------------|-----------|---------------------------------------|-------------------------|
| Number                                        |           | 23                                    | 18                      |
| Male number                                   | n (%)     | 9 (39.1)                              | 5 (27.8)                |
| Age                                           | year (SD) | 65.8 (11.1)                           | 68.5 (10.0)             |
| Underlying CVD-ILD positive                   | n (%)     | 20 (87.0)                             | 15 (83.3)               |
| Outcome dead                                  | n (%)     | 9 (39.1)                              | 7 (38.9)                |
| Corticosteroid administration as prednisolone | mg (SD)   | 10.2 (11.2)                           | 8.1 (8.7)               |
| Diabetes mellitus complication                | n (%)     | 6 (26.1)                              | 4 (22.2)                |

AoDILD: acute-onset diffuse interstitial lung disease, RA: rheumatoid arthritis, CVD-ILD: collagen vascular disease-associated interstitial lung disease, SD: standard deviation.
